# Supplementary material
Source: HighWire-hosted journal article supplement (https://www.cmajopen.ca/highwire/filestream/87870/field_highwire_adjunct_files/0/2021-0131-1-at.pdf)
Supplement: 2021-0131-1-at.pdf [file 2021-0131-1-at.pdf]

**Appendix Table 1. Variable checklist for each database**

| Database                                                                       | Variables                           | Location         | Definition                                                                                                                                               |
|--------------------------------------------------------------------------------|-------------------------------------|------------------|----------------------------------------------------------------------------------------------------------------------------------------------------------|
| National Ambulatory Care Reporting System (NACRS) <sup>1</sup> - Patient Level | Number of patients                  | Table 1, Table 2 | Count of patients                                                                                                                                        |
|                                                                                | Sex                                 | Table 1, Table 2 | Original data                                                                                                                                            |
|                                                                                | Age                                 | Table 1, Table 2 | Original data                                                                                                                                            |
|                                                                                | Rural/urban                         | Table 1, Table 2 | Derived from the truncated postal code. Rural residence had “0” in the second position of the truncated postal code.                                     |
|                                                                                | Weighted Charlson Comorbidity Index | Table 1, Table 2 | Derived from primary ED diagnosis. This index combines patients’ status on 17 medical comorbidities into a score with predictive validity for mortality. |
|                                                                                | Number of ED visits per person      | Table 1, Table 2 | Count of ED visits individually                                                                                                                          |
| National Ambulatory Care Reporting System (NACRS) <sup>1</sup> -Visit Level    | Number of ED visits                 | Table 1, Table 2 | Count of ED visits                                                                                                                                       |
|                                                                                | Arrival by ambulance                | Table 1, Table 2 | Original data                                                                                                                                            |
|                                                                                | Triage level (CTAS)                 | Table 1, Table 2 | Original data                                                                                                                                            |
|                                                                                | Alcohol-related visits              | Table 1, Table 2 | Identified from primary ED diagnosis based on standard in supplementary Table 1.                                                                         |
|                                                                                | Substance use-related visits        | Table 1, Table 2 | Mental and behavioural disorders related to psychoactive substance use identified from primary ED diagnosis based on                                     |
|                                                                                |                                     |                  |                                                                                                                                                          |

Appendix 1, as supplied by authors. Appendix to: Moe J, Wang E, McGregor MJ, et al. People who make frequent emergency department visits based on persistence of frequent use in Ontario and Alberta: a retrospective cohort study. *CMAJ Open* 2022. DOI:10.9778/cmajo.20210131. Copyright © 2022 The Author(s) or their employer(s).

To receive this resource in an accessible format, please contact us at [cmajgroup@cmaj.ca](mailto:cmajgroup@cmaj.ca).

|                                                                    |                                            |                  |                                                                                                                                       |
|--------------------------------------------------------------------|--------------------------------------------|------------------|---------------------------------------------------------------------------------------------------------------------------------------|
|                                                                    |                                            |                  | ICD-10-CA code F10-F19                                                                                                                |
|                                                                    | Top 5 ICD-10-CA ED diagnosis               | Table 1, Table 2 | Top 5 primary ED diagnosis with ICD-10-CA code                                                                                        |
|                                                                    | Visit disposition                          | Table 1, Table 2 | Original data                                                                                                                         |
|                                                                    |                                            |                  |                                                                                                                                       |
| Hospitalization Characteristics (DAD) <sup>2</sup>                 | Number of patients                         | Table 1, Table 2 | Count of patients                                                                                                                     |
|                                                                    | Number of admissions                       | Table 1, Table 2 | Count of admissions                                                                                                                   |
|                                                                    | Number of admissions per person            | Table 1, Table 2 | Count of admissions individually                                                                                                      |
|                                                                    | Median time admitted (days)                | Table 1, Table 2 | Original data: the total number of days the patient was hospitalized.                                                                 |
|                                                                    | Top 5 ICD-10-CA primary diagnosis          | Table 1, Table 2 | Top 5 the most responsible diagnosis for the patient during hospitalization                                                           |
|                                                                    | Top 5 ICD-10-CA primary diagnosis chapters | Table 1, Table 2 | Classified the most responsible diagnosis for the patient during hospitalization into ICD-10-CA diagnosis chapter and selected top 5. |
|                                                                    | Discharge disposition                      | Table 1, Table 2 | Original data                                                                                                                         |
|                                                                    |                                            |                  |                                                                                                                                       |
| Mental Health Hospitalization Characteristics (HMHDB) <sup>3</sup> | Number of patients                         | Table 1, Table 2 | Count of patients                                                                                                                     |
|                                                                    | Number of mental health admissions         | Table 1, Table 2 | Count of mental health admissions                                                                                                     |
|                                                                    | Homelessness                               | Table 1, Table 2 | Original data: indicates whether a person was homeless on admission                                                                   |

Appendix 1, as supplied by authors. Appendix to: Moe J, Wang E, McGregor MJ, et al. People who make frequent emergency department visits based on persistence of frequent use in Ontario and Alberta: a retrospective cohort study. *CMAJ Open* 2022. DOI:10.9778/cmajo.20210131. Copyright © 2022 The Author(s) or their employer(s).

To receive this resource in an accessible format, please contact us at [cmajgroup@cmaj.ca](mailto:cmajgroup@cmaj.ca).

|  |                                   |                  |                                                                                                     |
|--|-----------------------------------|------------------|-----------------------------------------------------------------------------------------------------|
|  | Length of stay at hospital (days) | Table 1, Table 2 | Original data: the total number of days the person was hospitalized.                                |
|  | Diagnosis category                | Table 1, Table 2 | Original data                                                                                       |
|  | Discharge disposition             | Table 1, Table 2 | Original data: broad mental health category based on the most responsible separation diagnosis code |

**Footnote:** Emergency department (ED), Canadian triage and acuity scale (CTAS), International Statistical Classification of Diseases and Related Health Problems (ICD-10-CA).

1. Canadian Institute for Health Information. Data Quality Documentation, National Ambulatory Care Reporting System, Current-Year Information, 2017-2018. Ottawa, ON: 2018. Available from: [www.cihi.ca/sites/default/files/document/current-year-information-nacrs-2017-2018-en-web.pdf](http://www.cihi.ca/sites/default/files/document/current-year-information-nacrs-2017-2018-en-web.pdf)

2. Canadian Institute for Health Information. Discharge Abstract Database Metadata (DAD). Ottawa, ON. Available from: [www.cihi.ca/en/discharge-abstract-database-metadata-dad](http://www.cihi.ca/en/discharge-abstract-database-metadata-dad).

3. Canadian Institute for Health Information. Hospital Mental Health Database, 2018-2019, User Documentation. 2020. Available from: [secure.cihi.ca/free\\_products/HMHDB-user-documentation-2018-2019-en.pdf](http://secure.cihi.ca/free_products/HMHDB-user-documentation-2018-2019-en.pdf)

Appendix 1, as supplied by authors. Appendix to: Moe J, Wang E, McGregor MJ, et al. People who make frequent emergency department visits based on persistence of frequent use in Ontario and Alberta: a retrospective cohort study. *CMAJ Open* 2022. DOI:10.9778/cmajo.20210131. Copyright © 2022 The Author(s) or their employer(s).

To receive this resource in an accessible format, please contact us at [cmajgroup@cmaj.ca](mailto:cmajgroup@cmaj.ca).

**Appendix Table 2. ICD-10-CA Alcohol-related Diagnostic Codes**

| <b>ICD-10-CA Code</b> | <b>Description</b>                                                                                  |
|-----------------------|-----------------------------------------------------------------------------------------------------|
| E244                  | Alcohol-induced pseudo-Cushing's syndrome                                                           |
| E52                   | Niacin deficiency [pellagra]                                                                        |
| F10.-                 | Mental and behavioural disorders due to use of alcohol                                              |
| F100                  | Mental and behavioural disorders due to use of alcohol, acute intoxication                          |
| F101                  | Mental and behavioural disorders due to use of alcohol, harmful use                                 |
| F102                  | Mental and behavioural disorders due to use of alcohol, dependence syndrome                         |
| F103                  | Mental and behavioural disorders due to use of alcohol, withdrawal state                            |
| F104                  | Mental and behavioural disorders due to use of alcohol, withdrawal state with delirium              |
| F105                  | Mental and behavioural disorders due to use of alcohol, psychotic disorder                          |
| F106                  | Mental and behavioural disorders due to use of alcohol, amnesic syndrome                            |
| F107                  | Mental and behavioural disorders due to use of alcohol, residual and late-onset psychotic disorder  |
| F108                  | Mental and behavioural disorders due to use of alcohol, other mental and behavioural disorders      |
| F109                  | Mental and behavioural disorders due to use of alcohol, unspecified mental and behavioural disorder |
| G312                  | Degeneration of nervous system due to alcohol                                                       |
| G621                  | Alcoholic polyneuropathy                                                                            |
| G721                  | Alcoholic myopathy                                                                                  |
| I426                  | Alcoholic cardiomyopathy                                                                            |
| K292                  | Alcoholic gastritis                                                                                 |
| K70.-                 | Alcoholic liver disease                                                                             |
| K700                  | Alcoholic fatty liver                                                                               |
| K701                  | Alcoholic hepatitis                                                                                 |
| K702                  | Alcoholic fibrosis and sclerosis of liver                                                           |
| K703                  | Alcoholic cirrhosis of liver                                                                        |
| K704                  | Alcoholic hepatic failure                                                                           |
| K709                  | Alcoholic liver disease, unspecified                                                                |
| K852                  | Alcohol-induced acute pancreatitis                                                                  |
| K860                  | Alcohol-induced chronic pancreatitis                                                                |
| O354                  | Maternal care for (suspected) damage to fetus from alcohol                                          |
| R780                  | Finding of alcohol in blood                                                                         |
| T510                  | Toxic effects of alcohol, Ethanol                                                                   |

Appendix 1, as supplied by authors. Appendix to: Moe J, Wang E, McGregor MJ, et al. People who make frequent emergency department visits based on persistence of frequent use in Ontario and Alberta: a retrospective cohort study. *CMAJ Open* 2022. DOI:10.9778/cmajo.20210131. Copyright © 2022 The Author(s) or their employer(s).

To receive this resource in an accessible format, please contact us at [cmajgroup@cmaj.ca](mailto:cmajgroup@cmaj.ca).

|      |                                                                     |
|------|---------------------------------------------------------------------|
| X65  | Intentional self-poisoning by and exposure to alcohol               |
| Y15  | Poisoning by and exposure to alcohol, undetermined intent           |
| Y90  | Evidence of alcohol involvement determined by blood alcohol level   |
| Y91  | Evidence of alcohol involvement determined by level of intoxication |
| Z040 | Blood-alcohol and blood-drug test                                   |
| Z714 | Alcohol abuse counselling and surveillance                          |
| Z721 | Alcohol use                                                         |

**Footnote:** International Statistical Classification of Diseases and Related Health Problems (ICD-10-CA).

Appendix 1, as supplied by authors. Appendix to: Moe J, Wang E, McGregor MJ, et al. People who make frequent emergency department visits based on persistence of frequent use in Ontario and Alberta: a retrospective cohort study. *CMAJ Open* 2022. DOI:10.9778/cmajo.20210131. Copyright © 2022 The Author(s) or their employer(s).

To receive this resource in an accessible format, please contact us at [cmajgroup@cmaj.ca](mailto:cmajgroup@cmaj.ca).

**Appendix Table 3. Summary of ICD-10-CA codes for substance use-related diagnoses based on the Canadian Institute for Health Information (CIHI) standard**

| Substance use category                                      | ICD-10-CA codes | ICD-10-CA Description                                                                                     |
|-------------------------------------------------------------|-----------------|-----------------------------------------------------------------------------------------------------------|
| Alcohol                                                     | E244            | Alcohol-induced pseudo-Cushing's syndrome                                                                 |
|                                                             | F10.–           | Mental and behavioural disorders due to use of alcohol                                                    |
|                                                             | G312            | Degeneration of nervous system due to alcohol                                                             |
|                                                             | G621            | Alcoholic polyneuropathy                                                                                  |
|                                                             | G721            | Alcoholic myopathy                                                                                        |
|                                                             | I426            | Alcoholic cardiomyopathy                                                                                  |
|                                                             | K292            | Alcoholic gastritis                                                                                       |
|                                                             | K70.–           | Alcoholic liver disease                                                                                   |
|                                                             | K852            | Alcohol-induced acute pancreatitis                                                                        |
|                                                             | K860            | Alcohol-induced chronic pancreatitis                                                                      |
|                                                             | O354–           | Maternal care for (suspected) damage to fetus from alcohol                                                |
|                                                             | Q860            | Fetal alcohol syndrome (dysmorphic)                                                                       |
|                                                             | R780            | Finding of alcohol in blood                                                                               |
|                                                             | T51.–           | Toxic effects of alcohol                                                                                  |
|                                                             | X45             | Accidental poisoning by and exposure to alcohol                                                           |
|                                                             | X65             | Intentional self-poisoning by and exposure to alcohol                                                     |
|                                                             | Y15             | Poisoning by and exposure to alcohol, undetermined intent                                                 |
| Opioids                                                     | F11.–           | Mental and behavioural disorders due to use of opioids                                                    |
|                                                             | T400            | Poisoning by opium                                                                                        |
|                                                             | T401            | Poisoning by heroin                                                                                       |
|                                                             | T402            | Poisoning by other opioids                                                                                |
|                                                             | T403            | Poisoning by methadone                                                                                    |
|                                                             | T404            | Poisoning by other synthetic narcotics                                                                    |
|                                                             | T406            | Poisoning by other and unspecified narcotics                                                              |
| Stimulants, cocaine, psychoactive and hallucinogens-related | F15.–           | Mental and behavioural disorders due to use of other stimulants, including caffeine                       |
|                                                             | T436            | Poisoning by other stimulants and amphetamines                                                            |
|                                                             | F14.–           | Mental and behavioural disorders due to use of cocaine                                                    |
|                                                             | T405            | Poisoning by cocaine                                                                                      |
|                                                             | F19.–           | Mental and behavioural disorders due to use of multiple drug use and use of other psychoactive substances |
|                                                             | T438            | Poisoning by other psychotropic drugs, not elsewhere classified                                           |

Appendix 1, as supplied by authors. Appendix to: Moe J, Wang E, McGregor MJ, et al. People who make frequent emergency department visits based on persistence of frequent use in Ontario and Alberta: a retrospective cohort study. *CMAJ Open* 2022. DOI:10.9778/cmajo.20210131. Copyright © 2022 The Author(s) or their employer(s).

To receive this resource in an accessible format, please contact us at [cmajgroup@cmaj.ca](mailto:cmajgroup@cmaj.ca).

|                     |                                  |                                                                                                                                                       |
|---------------------|----------------------------------|-------------------------------------------------------------------------------------------------------------------------------------------------------|
|                     | T439                             | Poisoning by psychotropic drug, unspecified                                                                                                           |
|                     | X41 (when coded without T42–T43) | Accidental poisoning by and exposure to antiepileptic, sedative-hypnotic, antiparkinsonism and psychotropic drugs, not elsewhere classified           |
|                     | X61 (when coded without T42–T43) | Intentional self-poisoning by and exposure to antiepileptic, sedative-hypnotic, antiparkinsonism and psychotropic drugs, not elsewhere classified     |
|                     | Y11 (when coded without T42–T43) | Poisoning by and exposure to antiepileptic, sedative-hypnotic, antiparkinsonism and psychotropic drugs, not elsewhere classified, undetermined intent |
|                     | Y12 (when coded without T40.–)   | Poisoning by and exposure to narcotics and psychodysleptics, [hallucinogens], not elsewhere classified, undetermined intent                           |
|                     | F16.–                            | Mental and behavioural disorders due to use of hallucinogens                                                                                          |
|                     | T408                             | Poisoning by lysergide [LSD]                                                                                                                          |
|                     | T409                             | Poisoning by other and unspecified psychodysleptics [hallucinogens]                                                                                   |
|                     | X42 (when coded without T40.–)   | Accidental poisoning by and exposure to narcotics and psychodysleptics [hallucinogens], not elsewhere classified                                      |
|                     | X62 (when coded without T40.–)   | Intentional self-poisoning by and exposure to narcotics and psychodysleptics [hallucinogens], not elsewhere classified                                |
| Other substance use | F12.–                            | Mental and behavioural disorders due to use of cannabinoids                                                                                           |
|                     | T407                             | Poisoning by cannabis (derivatives)                                                                                                                   |
|                     | F13.–                            | Mental and behavioural disorders due to use of sedatives or hypnotics                                                                                 |
|                     | T423                             | Poisoning by barbiturates                                                                                                                             |
|                     | T424                             | Poisoning by benzodiazepines                                                                                                                          |
|                     | T426                             | Poisoning by other antiepileptic and sedative-hypnotic drugs                                                                                          |
|                     | T427                             | Poisoning by antiepileptic and sedative-hypnotic drugs, unspecified                                                                                   |
|                     | F18.–                            | Mental and behavioural disorders due to use of volatile solvents                                                                                      |
|                     | F55                              | Abuse of non-dependence-producing substances                                                                                                          |

**Footnote:** International Statistical Classification of Diseases and Related Health Problems (ICD-10-CA).

Appendix 1, as supplied by authors. Appendix to: Moe J, Wang E, McGregor MJ, et al. People who make frequent emergency department visits based on persistence of frequent use in Ontario and Alberta: a retrospective cohort study. *CMAJ Open* 2022. DOI:10.9778/cmajo.20210131. Copyright © 2022 The Author(s) or their employer(s).

To receive this resource in an accessible format, please contact us at [cmajgroup@cmaj.ca](mailto:cmajgroup@cmaj.ca).

**Appendix Table 4: Demographic, ED Utilization, and Hospitalization Characteristics for People Who Made Frequent ED Visits in Ontario from April 1<sup>st</sup>, 2015 to March 31<sup>st</sup>, 2016, By Persistent Frequent ED Use Subgroups (Detailed Diagnostic Codes).**

| Persistent frequent ED use subgroups: Number of study years in which frequent ED use definition met (Years)                                                                                                    | 1                                            | 2                                            | 3                                           | 4                                           | 5                                                        |
|----------------------------------------------------------------------------------------------------------------------------------------------------------------------------------------------------------------|----------------------------------------------|----------------------------------------------|---------------------------------------------|---------------------------------------------|----------------------------------------------------------|
| <i>Patient Characteristics (NACRS)</i>                                                                                                                                                                         |                                              |                                              |                                             |                                             |                                                          |
| Number of patients in persistent frequent ED use subgroups, among those who made frequent ED visits in April 1 <sup>st</sup> , 2015 to March 31 <sup>st</sup> , 2016, n (%)                                    | 112,048 (44.3)                               | 62,813 (24.9)                                | 37,338 (14.8)                               | 23,397 (9.3)                                | 17,141 (6.8)                                             |
| Number of ED visits made by patients in persistent frequent ED use subgroups, among all visits by patients who made frequent ED visits in April 1 <sup>st</sup> , 2015 to March 31 <sup>st</sup> , 2016, n (%) | 583,092 (37.9)                               | 362,668 (23.6)                               | 238,976 (15.5)                              | 171,694 (11.2)                              | 183,162 (11.9)                                           |
| Top 5 ICD-10-CA ED diagnosis, n (%)                                                                                                                                                                            |                                              |                                              |                                             |                                             |                                                          |
| 1                                                                                                                                                                                                              | Other chemotherapy (Z512), 25,570 (4.4)      | Abdominal pain/colic (R104), 12,194 (3.4)    | Abdominal pain/colic (R104), 8,453 (3.5)    | Abdominal pain/colic (R104), 7,056 (4.1)    | Abdominal pain/colic (R104), 9,150 (5.0)                 |
| 2                                                                                                                                                                                                              | Abdominal pain/colic (R104), 18,609 (3.2)    | Other chemotherapy (Z512), 11,110 (3.1)      | Urinary tract infection (N390), 7,187 (3.0) | Urinary tract infection (N390), 4,956 (2.9) | Chest pain (R074), 5,559 (3.0)                           |
| 3                                                                                                                                                                                                              | Urinary tract infection (N390), 14,799 (2.5) | Urinary tract infection (N390), 10,829 (3.0) | Other chemotherapy (Z512), 5,843 (2.4)      | Chest pain (R074), 4,509 (2.6)              | Mental disorder alcohol intoxication (F100), 5,000 (2.7) |
| 4                                                                                                                                                                                                              | Chest pain (R074), 12,142 (2.1)              | Chest pain (R074), 8,651 (2.4)               | Chest pain (R074), 5,792 (2.4)              | Other chemotherapy (Z512), 3,485 (2.0)      | Urinary tract infection (N390), 4,798 (2.6)              |

Appendix 1, as supplied by authors. Appendix to: Moe J, Wang E, McGregor MJ, et al. People who make frequent emergency department visits based on persistence of frequent use in Ontario and Alberta: a retrospective cohort study. *CMAJ Open* 2022. DOI:10.9778/cmajo.20210131. Copyright © 2022 The Author(s) or their employer(s).

To receive this resource in an accessible format, please contact us at [cmajgroup@cmaj.ca](mailto:cmajgroup@cmaj.ca).



|    |                                                   |                                                  |                                                                                                   |                                                                                                   |                                           |
|----|---------------------------------------------------|--------------------------------------------------|---------------------------------------------------------------------------------------------------|---------------------------------------------------------------------------------------------------|-------------------------------------------|
| 5  | Cellulitis of lower limb (L0311),<br>10,178 (1.7) | Cellulitis of lower limb (L0311),<br>5,787 (1.6) | Chronic obstructive pulmonary disease with acute exacerbation, unspecified (J441),<br>3,576 (1.5) | Chronic obstructive pulmonary disease with acute exacerbation, unspecified (J441),<br>2,631 (1.5) | Other chemotherapy (Z512),<br>3,610 (2.0) |
| NA | 0 (0.0)                                           | 0 (0.0)                                          | 0 (0.0)                                                                                           | 0 (0.0)                                                                                           | 0 (0.0)                                   |

---

***Hospitalization Characteristics (DAD)***

---

| Overall Years of Frequent ED Use (Years)                                                          | 1<br>(N=112,048)                                             | 2<br>(N=62,813)                                              | 3<br>(N=37,338)                                                   | 4<br>(N=23,397)                                                   | 5<br>(N=17,141)                                                   |
|---------------------------------------------------------------------------------------------------|--------------------------------------------------------------|--------------------------------------------------------------|-------------------------------------------------------------------|-------------------------------------------------------------------|-------------------------------------------------------------------|
| Number of patients with at least one admission, among persistent frequent ED use subgroups, n (%) | 43,548 (38.9)                                                | 24,536 (39.1)                                                | 14,465 (38.7)                                                     | 8,948 (38.2)                                                      | 6,717 (39.2)                                                      |
| Number of admissions                                                                              | 84,784                                                       | 50,951                                                       | 31,194                                                            | 20,212                                                            | 16,672                                                            |
| Top 5 ICD-10-CA primary diagnosis among admissions, n (%)                                         |                                                              |                                                              |                                                                   |                                                                   |                                                                   |
| 1                                                                                                 | Congestive heart failure, unspecified (I500),<br>3,865 (4.6) | Congestive heart failure, unspecified (I500),<br>2,826 (5.5) | Congestive heart failure, unspecified (I500),<br>1,774 (5.7)      | COPD exacerbation (J441),<br>987 (4.9)                            | COPD exacerbation (J441),<br>751 (4.5)                            |
| 2                                                                                                 | Urinary tract infection (N390),<br>1,950 (2.3)               | COPD exacerbation (J441),<br>1,642 (3.2)                     | COPD exacerbation (J441),<br>1,474 (4.7)                          | Congestive heart failure, unspecified (I500),<br>984 (4.9)        | Congestive heart failure, unspecified (I500),<br>610 (3.7)        |
| 3                                                                                                 | Pneumonia (J189),<br>1,715 (2.0)                             | Urinary tract infection (N390),<br>1,453 (2.9)               | COPD, with acute lower respiratory infection (J440),<br>954 (3.1) | COPD, with acute lower respiratory infection (J440),<br>632 (3.1) | COPD, with acute lower respiratory infection (J440),<br>453 (2.7) |

Appendix 1, as supplied by authors. Appendix to: Moe J, Wang E, McGregor MJ, et al. People who make frequent emergency department visits based on persistence of frequent use in Ontario and Alberta: a retrospective cohort study. *CMAJ Open* 2022. DOI:10.9778/cmajo.20210131. Copyright © 2022 The Author(s) or their employer(s).

To receive this resource in an accessible format, please contact us at [cmajgroup@cmaj.ca](mailto:cmajgroup@cmaj.ca).

|    |                                                                            |                                                                           |                                                    |                                                    |                                                                                                              |
|----|----------------------------------------------------------------------------|---------------------------------------------------------------------------|----------------------------------------------------|----------------------------------------------------|--------------------------------------------------------------------------------------------------------------|
| 4  | COPD<br>exacerbation<br>(J441),<br>1,691 (2.0)                             | Pneumonia<br>(J189),<br>1,167 (2.3)                                       | Urinary tract<br>infection<br>(N390),<br>923 (3.0) | Urinary tract<br>infection<br>(N390),<br>586 (2.9) | Urinary tract<br>infection (N390),<br>452 (2.7)                                                              |
| 5  | Acute<br>subendocardial<br>myocardial<br>infarction (I214),<br>1,627 (1.9) | COPD, with acute<br>lower respiratory<br>infection (J440),<br>1,162 (2.3) | Pneumonia<br>(J189),<br>684 (2.2)                  | Pneumonia<br>(J189),<br>461 (2.3)                  | Mental and<br>behavioural<br>disorders due to<br>use of alcohol,<br>withdrawal state<br>(F103),<br>353 (2.1) |
| NA | 0 (0.0)                                                                    | 0 (0.0)                                                                   | 0 (0.0)                                            | 0 (0.0)                                            | 0 (0.0)                                                                                                      |

**Top 5 ICD-10-CA  
primary diagnosis  
chapters among  
admissions, n (%)**

|                                                                                                   |               |              |              |              |              |
|---------------------------------------------------------------------------------------------------|---------------|--------------|--------------|--------------|--------------|
| Diseases of the<br>circulatory system (IX)                                                        | 15,152 (17.9) | 8,663 (17.0) | 4,891 (15.7) | 2,887 (14.3) | 1,951 (11.7) |
| Diseases of the<br>respiratory system (X)                                                         | 8,640 (10.2)  | 6,679 (13.1) | 4,700 (15.1) | 3,062 (15.1) | 2,357 (14.1) |
| Diseases of the digestive<br>system (XI)                                                          | 12,393 (14.6) | 6,904 (13.6) | 4,158 (13.3) | 2,707 (13.4) | 2,111 (12.7) |
| Symptoms and abnormal<br>clinical and laboratory<br>findings, not otherwise<br>classified (XVIII) | 7,671 (9.0)   | 5,027 (9.9)  | 3,230 (10.4) | 2,222 (11.0) | 2,098 (12.6) |
| Injury, poisoning and<br>certain other<br>consequences of external<br>causes (XIX)                | 7,780 (9.2)   | 4,436 (8.7)  | 2,608 (8.4)  | 1,768 (8.7)  | 1,506 (9.0)  |
| NA                                                                                                | 0 (0.0)       | 0 (0.0)      | 0 (0.0)      | 0 (0.0)      | 0 (0.0)      |

**Footnote:** Emergency department (ED), Chronic obstructive pulmonary disease (COPD), National Ambulatory Care Reporting System metadata (NACRS), International Statistical Classification of Diseases and Related Health Problems (ICD-10-CA), Discharge Abstract Database metadata (DAD).

Appendix 1, as supplied by authors. Appendix to: Moe J, Wang E, McGregor MJ, et al. People who make frequent emergency department visits based on persistence of frequent use in Ontario and Alberta: a retrospective cohort study. *CMAJ Open* 2022. DOI:10.9778/cmajo.20210131. Copyright © 2022 The Author(s) or their employer(s).

To receive this resource in an accessible format, please contact us at [cmajgroup@cmaj.ca](mailto:cmajgroup@cmaj.ca).

**Appendix Table 5: Demographic, ED Utilization, and Hospitalization Characteristics for People Who Made Frequent ED Visits in Alberta from April 1<sup>st</sup>, 2015 to March 31<sup>st</sup>, 2016, By Persistent Frequent ED Use Subgroups (Detailed Diagnostic Codes).**

| Persistent frequent ED use subgroups: Number of study years in which frequent ED use definition met (Years)                                                                                                    | 1                                                               | 2                                                               | 3                                                               | 4                                                               | 5                                        |
|----------------------------------------------------------------------------------------------------------------------------------------------------------------------------------------------------------------|-----------------------------------------------------------------|-----------------------------------------------------------------|-----------------------------------------------------------------|-----------------------------------------------------------------|------------------------------------------|
| <i>Patient Characteristics (NACRS)</i>                                                                                                                                                                         |                                                                 |                                                                 |                                                                 |                                                                 |                                          |
| Number of patients in persistent frequent ED use subgroups, among those who made frequent ED visits in April 1 <sup>st</sup> , 2015 to March 31 <sup>st</sup> , 2016, n (%)                                    | 28,290 (44.7)                                                   | 14,730 (23.3)                                                   | 9,058 (14.3)                                                    | 5,958 (9.4)                                                     | 5,202 (8.2)                              |
| Number of ED visits made by patients in persistent frequent ED use subgroups, among all visits by patients who made frequent ED visits in April 1 <sup>st</sup> , 2015 to March 31 <sup>st</sup> , 2016, n (%) | 206,562 (38.5)                                                  | 120,083 (22.4)                                                  | 80,140 (14.9)                                                   | 59,006 (11.0)                                                   | 70,934 (13.2)                            |
| Top 5 ICD-10-CA ED diagnosis, n (%)                                                                                                                                                                            |                                                                 |                                                                 |                                                                 |                                                                 |                                          |
| 1                                                                                                                                                                                                              | Other chemotherapy (Z512), 35,297 (17.1)                        | Other chemotherapy (Z512), 17,185 (14.3)                        | Other chemotherapy (Z512), 9,425 (11.8)                         | Other chemotherapy (Z512), 6,187 (10.5)                         | Other chemotherapy (Z512), 8,240 (11.6)  |
| 2                                                                                                                                                                                                              | Attention to surgical dressings and sutures (Z480), 8,806 (4.3) | Attention to surgical dressings and sutures (Z480), 3,791 (3.2) | Abdominal pain/colic (R104), 1,969 (2.5)                        | Abdominal pain/colic (R104), 1,647 (2.8)                        | Abdominal pain/colic (R104), 2,196 (3.1) |
| 3                                                                                                                                                                                                              | Abdominal pain/colic (R104), 3,993 (1.9)                        | Abdominal pain/colic (R104), 2,719 (2.3)                        | Attention to surgical dressings and sutures (Z480), 1,876 (2.3) | Attention to surgical dressings and sutures (Z480), 1,496 (2.5) | Migraine, unspecified, 2,019 (2.8)       |

Appendix 1, as supplied by authors. Appendix to: Moe J, Wang E, McGregor MJ, et al. People who make frequent emergency department visits based on persistence of frequent use in Ontario and Alberta: a retrospective cohort study. *CMAJ Open* 2022. DOI:10.9778/cmajo.20210131. Copyright © 2022 The Author(s) or their employer(s).

To receive this resource in an accessible format, please contact us at [cmajgroup@cmaj.ca](mailto:cmajgroup@cmaj.ca).

|    |                                                                   |                                                |                                                |                                                             |                                                             |
|----|-------------------------------------------------------------------|------------------------------------------------|------------------------------------------------|-------------------------------------------------------------|-------------------------------------------------------------|
| 4  | Other specified orthopaedic follow-up care (Z478),<br>3,773 (1.8) | Urinary tract infection (N390),<br>2,477 (2.1) | Urinary tract infection (N390),<br>1,831 (2.3) | Urinary tract infection (N390),<br>1,450 (2.5)              | Mental disorder alcohol intoxication (F100),<br>1,897 (2.7) |
| 5  | Urinary tract infection (N390),<br>3,611 (1.7)                    | Chest pain (R074),<br>817 (1.5)                | Chest pain (R074),<br>1,333 (1.7)              | Mental disorder alcohol intoxication (F100),<br>1,029 (1.7) | Urinary tract infection (N390),<br>1,499 (2.1)              |
| NA | 0 (0.0)                                                           | 0 (0.0)                                        | 0 (0.0)                                        | 0 (0.0)                                                     | 0 (0.0)                                                     |

### *Hospitalization Characteristics (DAD)*

| Overall Years of Frequent ED Use (Years)                                                          | 1<br>(N=28,290)                                            | 2<br>(N=14,730)                                            | 3<br>(N=9,058)                                             | 4<br>(N=5,958)                                                                                | 5<br>(N=5,202)                                                                                |
|---------------------------------------------------------------------------------------------------|------------------------------------------------------------|------------------------------------------------------------|------------------------------------------------------------|-----------------------------------------------------------------------------------------------|-----------------------------------------------------------------------------------------------|
| Number of patients with at least one admission, among persistent frequent ED use subgroups, n (%) | 11,287 (39.9)                                              | 6,248 (42.4)                                               | 3,846 (42.5)                                               | 2,590 (43.5)                                                                                  | 2,338 (44.9)                                                                                  |
| Number of admissions                                                                              | 22,389                                                     | 13,125                                                     | 8,437                                                      | 5,895                                                                                         | 5,729                                                                                         |
| Top 5 ICD-10-CA primary diagnosis among admissions, n (%)                                         |                                                            |                                                            |                                                            |                                                                                               |                                                                                               |
| 1                                                                                                 | Congestive heart failure, unspecified (I500),<br>844 (3.8) | Congestive heart failure, unspecified (I500),<br>504 (3.8) | COPD exacerbation (J441),<br>358 (4.2)                     | COPD exacerbation (J441),<br>249 (4.2)                                                        | COPD exacerbation (J441),<br>226 (3.9)                                                        |
| 2                                                                                                 | COPD exacerbation (J441),<br>530 (2.4)                     | COPD exacerbation (J441),<br>424 (3.2)                     | Congestive heart failure, unspecified (I500),<br>260 (3.1) | Mental and behavioural disorders due to use of alcohol, withdrawal state (F103),<br>165 (2.8) | Mental and behavioural disorders due to use of alcohol, withdrawal state (F103),<br>210 (3.7) |
| 3                                                                                                 | Urinary tract infection (N390),<br>396 (1.8)               | Pneumonia (J189),<br>274 (2.1)                             | COPD, with acute lower respiratory                         | Congestive heart failure,                                                                     | COPD, with acute lower                                                                        |

Appendix 1, as supplied by authors. Appendix to: Moe J, Wang E, McGregor MJ, et al. People who make frequent emergency department visits based on persistence of frequent use in Ontario and Alberta: a retrospective cohort study. *CMAJ Open* 2022. DOI:10.9778/cmajo.20210131. Copyright © 2022 The Author(s) or their employer(s).

To receive this resource in an accessible format, please contact us at [cmajgroup@cmaj.ca](mailto:cmajgroup@cmaj.ca).

|    |                                                                            |                                                                         |                                                 |                                                                                                                |                                                                  |
|----|----------------------------------------------------------------------------|-------------------------------------------------------------------------|-------------------------------------------------|----------------------------------------------------------------------------------------------------------------|------------------------------------------------------------------|
|    |                                                                            |                                                                         | infection (J440),<br>223 (2.6)                  | unspecified (I500),<br>160 (2.7)<br>COPD, with<br>acute lower<br>respiratory<br>infection (J440),<br>157 (2.7) | respiratory<br>infection (J440),<br>161 (2.8)                    |
| 4  | Pneumonia (J189),<br>390 (1.7)                                             | COPD, with acute<br>lower respiratory<br>infection (J440),<br>264 (2.0) | Pneumonia (J189),<br>177 (2.1)                  |                                                                                                                | Pneumonia (J189),<br>157 (2.7)                                   |
| 5  | COPD, with<br>acute lower<br>respiratory<br>infection (J440),<br>318 (1.4) | Urinary tract<br>infection (N390),<br>257 (2.0)                         | Urinary tract<br>infection (N390),<br>166 (2.0) | Pneumonia (J189),<br>137 (2.3)                                                                                 | Congestive<br>heart failure,<br>unspecified (I500),<br>129 (2.3) |
| NA | 0 (0.0)                                                                    | 0 (0.0)                                                                 | 0 (0.0)                                         | 0 (0.0)                                                                                                        | 0 (0.0)                                                          |

**Top 5 ICD-10-CA  
primary diagnosis  
chapters among  
admissions, n (%)**

|   |                                                                                                        |                                                                                        |                                                               |                                                             |                                                                                                        |
|---|--------------------------------------------------------------------------------------------------------|----------------------------------------------------------------------------------------|---------------------------------------------------------------|-------------------------------------------------------------|--------------------------------------------------------------------------------------------------------|
| 1 | Diseases of the<br>circulatory<br>system (IX),<br>3,211 (14.3)                                         | Diseases of the<br>digestive system<br>(XI), 1,729 (13.2)                              | Diseases of<br>the respiratory<br>system (X),<br>1,164 (13.8) | Mental and<br>behavioral<br>disorders (V),<br>945 (16.0)    | Mental and<br>behavioral<br>disorders (V),<br>975 (17.0)                                               |
| 2 | Diseases of the<br>digestive system<br>(XI), 3,186 (14.2)                                              | Mental and<br>behavioral<br>disorders (V),<br>1,573 (12.0)                             | Mental and<br>behavioral<br>disorders (V),<br>1,153 (13.7)    | Diseases of the<br>respiratory<br>system (X),<br>850 (14.4) | Diseases of the<br>respiratory<br>system (X),<br>844 (14.7)                                            |
| 3 | Injury, poisoning<br>and certain other<br>consequences of<br>external causes<br>(XIX),<br>2,373 (10.6) | Diseases of the<br>circulatory system<br>(IX),<br>1,569 (12.0)                         | Diseases of<br>the digestive<br>system (XI),<br>1,004 (11.9)  | Diseases of the<br>circulatory<br>system (IX),<br>524 (8.9) | Diseases of the<br>digestive<br>system (XI),<br>676 (11.8)                                             |
| 4 | Mental and<br>behavioral<br>disorders (V),<br>2,187 (9.8)                                              | Diseases of the<br>respiratory<br>system (X), 1,562<br>(11.9)                          | Diseases of<br>the circulatory<br>system (IX),<br>874 (10.4)  | Diseases of the<br>digestive<br>system (XI),<br>690 (11.7)  | Injury, poisoning<br>and certain<br>other<br>consequences<br>of external<br>causes (XIX),<br>534 (9.3) |
| 5 | Diseases of the<br>respiratory<br>system (X),<br>2,184 (9.8)                                           | Injury, poisoning<br>and certain other<br>consequences of<br>external causes<br>(XIX), | Injury,<br>poisoning and<br>certain other<br>consequences     | Injury,<br>poisoning and<br>certain other<br>consequences   | Symptoms,<br>signs and<br>abnormal<br>clinical and<br>laboratory                                       |

Appendix 1, as supplied by authors. Appendix to: Moe J, Wang E, McGregor MJ, et al. People who make frequent emergency department visits based on persistence of frequent use in Ontario and Alberta: a retrospective cohort study. *CMAJ Open* 2022. DOI:10.9778/cmajo.20210131. Copyright © 2022 The Author(s) or their employer(s).

To receive this resource in an accessible format, please contact us at [cmajgroup@cmaj.ca](mailto:cmajgroup@cmaj.ca).

|    |         |              |                                            |                                            |                                                                   |
|----|---------|--------------|--------------------------------------------|--------------------------------------------|-------------------------------------------------------------------|
|    |         | 1,315 (10.0) | of external<br>causes (XIX),<br>870 (10.3) | of external<br>causes (XIX),<br>604 (10.2) | findings, not<br>elsewhere<br>classified<br>(XVIII), 453<br>(7.9) |
| NA | 0 (0.0) | 0 (0.0)      | 0 (0.0)                                    | 0 (0.0)                                    | 0 (0.0)                                                           |

**Footnote:** Emergency department (ED), Chronic obstructive pulmonary disease (COPD), National Ambulatory Care Reporting System metadata (NACRS), International Statistical Classification of Diseases and Related Health Problems (ICD-10-CA), Discharge Abstract Database metadata (DAD).

Appendix 1, as supplied by authors. Appendix to: Moe J, Wang E, McGregor MJ, et al. People who make frequent emergency department visits based on persistence of frequent use in Ontario and Alberta: a retrospective cohort study. *CMAJ Open* 2022. DOI:10.9778/cmajo.20210131. Copyright © 2022 The Author(s) or their employer(s).

To receive this resource in an accessible format, please contact us at [cmajgroup@cmaj.ca](mailto:cmajgroup@cmaj.ca).

**Appendix Table 6: Kolmogorov-Smirnov test of normality for continuous variables**

| <b>Variables</b>                    | <b>Statistic</b> | <b>P value</b> |
|-------------------------------------|------------------|----------------|
| <b>NACRS</b>                        |                  |                |
| Age                                 | 0.08             | <0.001         |
| Number of visits to the ED          | 0.34             | <0.001         |
| Weighted Charlson Comorbidity Index | 0.46             | <0.001         |
|                                     |                  |                |
| <b>DAD</b>                          |                  |                |
| Number of admissions                | 0.28             | <0.001         |
| Length of stay                      | 0.28             | <0.001         |
|                                     |                  |                |
| <b>HMHDB</b>                        |                  |                |
| Number of mental health admissions  | 0.34             | <0.001         |
| Length of stay                      | 0.41             | <0.001         |

**Footnote:** Emergency department (ED), National Ambulatory Care Reporting System metadata (NACRS), Discharge Abstract Database (DAD), Hospital Mental Health Database Metadata (HMHDB).

Appendix 1, as supplied by authors. Appendix to: Moe J, Wang E, McGregor MJ, et al. People who make frequent emergency department visits based on persistence of frequent use in Ontario and Alberta: a retrospective cohort study. *CMAJ Open* 2022. DOI:10.9778/cmajo.20210131. Copyright © 2022 The Author(s) or their employer(s).

To receive this resource in an accessible format, please contact us at [cmajgroup@cmaj.ca](mailto:cmajgroup@cmaj.ca).
